# Supplementary material for: Identification of High-Affinity Inhibitors of Cyclin-Dependent Kinase 2 Towards Anticancer Therapy
Source: PubMed Central journal article supplement (PMC6943647; doi:10.3390/molecules24244589), 2019-12-15
Supplement: molecules-24-04589-s001.pdf [file molecules-24-04589-s001.pdf]

**Table S1:** Interacting residues of CDK2 PDB entries with their co-crystallized ligands. Number of bonds are mentioned in bracket.

| S. No. | PDB ID | Ligand ID | Participating residue in polar interaction     |
|--------|--------|-----------|------------------------------------------------|
| 1.     | 1AQ1   | STU       | Glu81, Leu83, Asp86, Gln131 [2]                |
| 2.     | 1CKP   | PVB       | Leu83 [3]                                      |
| 3.     | 1DM2   | HMD       | Gly81 [2], Leu83 [2], Asp145 [2], Asn132       |
| 4.     | 1E1V   | CMG       | Glu81, Leu83                                   |
| 5.     | 1E1X   | NW1       | Lys33 [2], Glu81, Leu83                        |
| 6.     | 1GIH   | 1PU       | Lys33, Leu83 [3]                               |
| 7.     | 1GII   | 1PU       | Val83 [3], Asp145                              |
| 8.     | 1GIJ   | 2PU       | Val83 [3], Asp86, Asp145                       |
| 9.     | 1GZ8   | MBP       | Glu172, Gly176 [2], Lys178, Tyr179             |
| 10.    | 1H0V   | UN4       | Lys33, Leu83 [2], Glu81, Asp86, Gln131 [2]     |
| 11.    | 1H0W   | 207       | Glu81                                          |
| 12.    | 1FVT   | 106       | Glu81, Leu83 [2], Asp86 [2]                    |
| 13.    | 1G5S   | I17       | Leu83 [2], Asn132, Asp145                      |
| 14.    | 1OIQ   | HDU       | Lys33, Asp145, Gly81, Leu83 [2]                |
| 15.    | 1OIR   | HDY       | Leu83 [2], Lys89                               |
| 16.    | 1OIT   | HDT       | Lys33, Asp145, Leu83, Asp86 [3]                |
| 17.    | 1P2A   | 5BN       | Glu81, Leu83 [3], Asn132, Asp145 [2]           |
| 18.    | 1PF8   | SU9       | Glu81, Leu83 [3]                               |
| 19.    | 1PXI   | CK1       | Lys33, Glu81                                   |
| 20.    | 1PXJ   | CK2       | Lys33, Glu81, Leu83                            |
| 21.    | 1PXK   | CK3       | Leu83 [4], His84, Asp145 [2]                   |
| 22.    | 1PXL   | CK4       | Leu83 [3], Asp145 [2]                          |
| 23.    | 1PXM   | CK5       | Leu83 [2], Asp86, Asp145                       |
| 24.    | 1PXN   | CK6       | Leu83 [3], Lys33, Asp145                       |
| 25.    | 1PXO   | CK7       | Ile10, Lys33, Asp145 [3], Leu83 [3], Asp86 [2] |
| 26.    | 1PXP   | CK8       | Leu83 [2], Asp145                              |
| 27.    | 2A0C   | CK9       | Leu83 [2], Gln131                              |
| 28.    | 2BHE   | BRY       | Glu81, Leu83 [3]                               |
| 29.    | 2BHH   | RYU       | Glu12, Glu81, Lys33, Leu83 [3], Asn132         |
| 30.    | 2DS1   | 1CD       | Lys33, Val83 [3]                               |
| 31.    | 2FVD   | LIA       | Glu81, Leu83, His84, Asp86, Lys89              |
| 32.    | 2R3F   | SC8       | Lys33, Leu83 [2]                               |
| 33.    | 2R3G   | SC9       | Leu83, Asp86, Lys89                            |
| 34.    | 2R3H   | SCE       | Leu83 [3]                                      |
| 35.    | 2R3I   | SCF       | Lys33 [2], Leu83 [4]                           |
| 36.    | 2R3J   | SCJ       | Leu83 [2]                                      |
| 37.    | 2R3K   | SCQ       | Leu83 [2], Lys89                               |
| 38.    | 2R3L   | SCW       | Leu83 [2]                                      |
| 39.    | 2R3M   | SCX       | Leu83 [2], Lys86 [2], Ile10                    |
| 40.    | 2R3N   | SCZ       | Leu83 [2]                                      |
| 41.    | 2R3O   | 2SC       | Leu83 [2]                                      |
| 42.    | 2R3P   | 3SC       | Leu83 [4], Asp145 [2]                          |
| 43.    | 2R31Q  | 5SC       | Lys33, Leu83 [2]                               |
| 44.    | 2R3R   | 6SC       | Leu83 [3]                                      |
| 45.    | 2VTA   | LZ1       | Leu83 [2], Glu81                               |
| 46.    | 2VTH   | LZ2       | Leu83, Glu81                                   |
| 47.    | 2VTI   | LZ3       | Leu83 [2], Glu81, Asp86, Lys89                 |
| 48.    | 2VTJ   | LZ4       | Leu83 [2], Asp86 [2]                           |
| 49.    | 2VTL   | LZ5       | Leu83 [3]                                      |
| 50.    | 2VTM   | LZM       | Leu83, Glu81                                   |
| 51.    | 2VTN   | LZ7       | Leu83 [2], Glu81                               |
| 52.    | 2VTO   | LZ8       | Leu83 [2], Glu81                               |
| 53.    | 2VTP   | LZ9       | Leu83 [2], Glu81                               |
| 54.    | 2VTQ   | LZA       | Leu83 [2], Glu81, His84                        |
| 55.    | 2VTR   | LZB       | Leu83 [2]                                      |

|     |      |     |                                      |
|-----|------|-----|--------------------------------------|
| 56. | 2VTS | LZC | Lys33 [2], Leu83 [2], Asn132, Asp145 |
| 57. | 2VTT | LZD | Leu83 [3], Glu81, Asp86              |
| 58. | 2VU3 | LZE | Tyr80, Arg180 [2]                    |
| 59. | 2W1H | L0F | Glu81 [2], Leu83 [2]                 |
| 60. | 3FZ1 | B98 | Lys33, Asp145 [2], Leu83, Asn132     |
| 61. | 3LE6 | 2BZ | Glu81 [2], Leu83 [2], Asp86 [2]      |

**Table S2:** Binding affinities of the selected PubChem compounds.

| S. No | PubChem ID | Affinity [Kcal/mol] |     |           |      |
|-------|------------|---------------------|-----|-----------|------|
| 1.    | 117080005  | -9.6                | 25. | 67002045  | -8.8 |
| 2.    | 117091375  | -9.6                | 26. | 854017    | -8.8 |
| 3.    | 117090929  | -9.3                | 27. | 102366257 | -8.7 |
| 4.    | 10618917   | -9.2                | 28. | 11048773  | -8.7 |
| 5.    | 117086854  | -9.2                | 29. | 117081762 | -8.7 |
| 6.    | 118590042  | -9.2                | 30. | 21922919  | -8.7 |
| 7.    | 71109332   | -9.2                | 31. | 44315927  | -8.7 |
| 8.    | 10523324   | -9.1                | 32. | 59068996  | -8.7 |
| 9.    | 44353621   | -9.1                | 33. | 6538930   | -8.7 |
| 10.   | 67003239   | -9.1                | 34. | 6605112   | -8.7 |
| 11.   | 118590044  | -9.0                | 35. | 67002456  | -8.7 |
| 12.   | 6538928    | -9.0                | 36. | 67002669  | -8.7 |
| 13.   | 67002909   | -9.0                | 37. | 67002876  | -8.7 |
| 14.   | 10917098   | -8.9                | 38. | 67003044  | -8.7 |
| 15.   | 117081323  | -8.9                | 39. | 78074798  | -8.7 |
| 16.   | 59614560   | -8.9                | 40. | 9933766   | -8.7 |
| 17.   | 67002677   | -8.9                | 41. | 101874157 | -8.6 |
| 18.   | 117079230  | -8.8                | 42. | 10228672  | -8.6 |
| 19.   | 117092467  | -8.8                | 43. | 10806944  | -8.6 |
| 20.   | 17956382   | -8.8                | 44. | 10961500  | -8.6 |
| 21.   | 25007915   | -8.8                | 45. | 110154135 | -8.6 |
| 22.   | 6605150    | -8.8                | 46. | 11198931  | -8.6 |
| 23.   | 6605230    | -8.8                | 47. | 11416708  | -8.6 |
| 24.   | 67002002   | -8.8                | 48. | 117080614 | -8.6 |
|       |            |                     | 49. | 117081891 | -8.6 |
|       |            |                     | 50. | 117082204 | -8.6 |

**Table S3:** Physicochemical properties of the selected compounds with their consecutive values (MW = Molecular weight, LogP = lipophilicity, HBD = Hydrogen bond donor, HBA = Hydrogen bond sceptor, rBonds = Rotatable bonds, LV = Lipinski violation).

| S. No. | Compound ID    | MW     | rBonds | HBA | HBD | iLogP | LV |
|--------|----------------|--------|--------|-----|-----|-------|----|
| 1.     | Olomoucine     | 298.34 | 6      | 4   | 3   | 2.62  | 0  |
| 2.     | Hymenialdisine | 324.13 | 0      | 3   | 4   | 0.92  | 0  |
| 3.     | SU9516         | 241.25 | 2      | 3   | 2   | 1.31  | 0  |
| 4.     | Bosutinib      | 530.45 | 9      | 7   | 1   | 4.68  | 1  |
| 5.     | 854017         | 309.37 | 4      | 4   | 1   | 3.00  | 0  |
| 6.     | 6605112        | 394.51 | 8      | 5   | 1   | 4.17  | 0  |
| 7.     | 6605150        | 380.49 | 6      | 5   | 2   | 3.40  | 0  |
| 8.     | 6605230        | 428.53 | 7      | 5   | 2   | 3.92  | 0  |
| 9.     | 9933766        | 456.58 | 8      | 4   | 3   | 4.26  | 0  |
| 10.    | 10228672       | 498.54 | 10     | 7   | 3   | 4.43  | 0  |
| 11.    | 10523324       | 372.47 | 7      | 3   | 2   | 3.73  | 0  |
| 12.    | 10618917       | 366.46 | 5      | 4   | 2   | 3.16  | 0  |
| 13.    | 10806944       | 338.41 | 5      | 4   | 2   | 2.19  | 0  |
| 14.    | 10917098       | 435.60 | 10     | 4   | 2   | 4.32  | 0  |
| 15.    | 11198931       | 351.45 | 5      | 4   | 2   | 3.38  | 0  |
| 16.    | 11416708       | 346.39 | 6      | 5   | 2   | 3.07  | 0  |

|     |           |        |    |   |   |       |   |
|-----|-----------|--------|----|---|---|-------|---|
| 17. | 17956382  | 467.30 | 6  | 6 | 1 | 3.69  | 0 |
| 18. | 21922919  | 406.52 | 6  | 4 | 3 | 3.56  | 0 |
| 19. | 25007915  | 374.44 | 6  | 4 | 3 | 3.24  | 0 |
| 20. | 44315927  | 394.51 | 7  | 4 | 2 | 3.62  | 0 |
| 21. | 44353621  | 406.52 | 6  | 4 | 2 | 4.12  | 0 |
| 22. | 59068996  | 369.48 | 7  | 3 | 4 | -0.81 | 0 |
| 23. | 59614560  | 360.41 | 6  | 4 | 3 | 3.23  | 0 |
| 24. | 67002002  | 431.53 | 8  | 4 | 4 | 3.45  | 0 |
| 25. | 67002045  | 427.52 | 8  | 5 | 4 | 3.64  | 0 |
| 26. | 67002456  | 409.53 | 7  | 4 | 4 | 3.57  | 0 |
| 27. | 67002669  | 423.55 | 8  | 4 | 4 | 3.38  | 0 |
| 28. | 67002677  | 417.51 | 8  | 4 | 4 | 3.32  | 0 |
| 29. | 67002876  | 413.49 | 7  | 5 | 4 | 3.56  | 0 |
| 30. | 67002909  | 421.47 | 8  | 5 | 4 | 3.33  | 0 |
| 31. | 67003044  | 409.53 | 7  | 4 | 4 | 3.65  | 0 |
| 32. | 67003239  | 441.54 | 8  | 5 | 4 | 3.79  | 0 |
| 33. | 71109332  | 437.54 | 8  | 7 | 1 | 4.08  | 0 |
| 34. | 78074798  | 430.55 | 10 | 4 | 3 | 4.28  | 0 |
| 35. | 101874157 | 282.34 | 4  | 3 | 1 | 2.33  | 0 |
| 36. | 102366257 | 385.46 | 8  | 4 | 2 | 3.79  | 0 |
| 37. | 110154135 | 353.42 | 4  | 5 | 4 | 2.40  | 0 |
| 38. | 117079230 | 392.50 | 5  | 4 | 2 | 3.58  | 0 |
| 39. | 117080005 | 435.57 | 6  | 5 | 1 | 4.09  | 0 |
| 40. | 117080614 | 435.57 | 6  | 5 | 1 | 4.22  | 0 |
| 41. | 117081323 | 310.35 | 4  | 4 | 3 | 1.46  | 0 |
| 42. | 117081762 | 331.37 | 5  | 4 | 2 | 2.98  | 0 |
| 43. | 117081891 | 337.42 | 5  | 4 | 2 | 3.30  | 0 |
| 44. | 117082204 | 346.39 | 5  | 4 | 3 | 2.79  | 0 |
| 45. | 117086854 | 489.66 | 7  | 5 | 2 | 4.54  | 0 |
| 46. | 117090929 | 435.57 | 8  | 5 | 2 | 4.22  | 0 |
| 47. | 117091375 | 406.52 | 6  | 5 | 1 | 4.18  | 0 |
| 48. | 117092467 | 353.42 | 7  | 5 | 3 | 2.07  | 0 |
| 49. | 118590042 | 474.57 | 9  | 5 | 3 | 4.45  | 0 |
| 50. | 118590044 | 474.57 | 9  | 5 | 3 | 4.84  | 0 |
| 51. | 6538928   | 406.52 | 6  | 4 | 2 | 3.77  | 0 |
| 52. | 6538930   | 414.50 | 7  | 4 | 2 | 3.54  | 0 |

**Table S4:** ADME properties of the selected compounds. Where- BBB is blood brain barrier penetration ability, HIA is human intestinal absorption, LogS is water solubility log mol/L, Log  $K_p$  is skin permeation (cm/s), TPSA is topological polar surface area, NC: Non-carcinogenic, and LV is lead-likeness violation.

| S. No. | Comp. ID       | BBB | HIA  | Log $K_p$ | CYP2C9 inhibitor | LogS  | TPSA   | Carcinogenicity |
|--------|----------------|-----|------|-----------|------------------|-------|--------|-----------------|
| 1.     | Olomoucine     | No  | High | -7.05     | No               | -2.95 | 87.89  | NC              |
| 2.     | Hymenialdisine | No  | High | -8.39     | No               | -1.74 | 112.37 | NC              |
| 3.     | SU9516         | Yes | High | -7.03     | No               | -2.04 | 67.01  | NC              |
| 4.     | Bosutinib      | No  | High | -5.72     | Yes              | -6.87 | 82.88  | NC              |
| 5.     | 117081891      | Yes | High | -6.19     | No               | -4.32 | 75.86  | NC              |
| 6.     | 10806944       | No  | High | -6.81     | No               | -3.48 | 79.10  | NC              |
| 7.     | 101874157      | Yes | High | -6.30     | No               | -3.6  | 72.86  | NC              |
| 8.     | 117081762      | Yes | High | -6.18     | Yes              | -4.27 | 75.86  | NC              |

**Table S5:** Chemical structures of the selected compounds along with their biological activity.

| Compound       | Chemical structure                                                                | Biological activity   | References                                                          |
|----------------|-----------------------------------------------------------------------------------|-----------------------|---------------------------------------------------------------------|
| 101874157      | 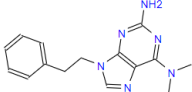 | -                     | -                                                                   |
| Olomoucine     |  | CDK2 inhibition       | PMID:17139284,<br>PMID:17016423,<br>PMID:10592235,<br>PMID:11752352 |
| Hymenialdisine |  | Stabilisation of CDK2 | PMID:18077363                                                       |
| SU9516         |  | CDK2 inhibition       | PMID:12234612,<br>PMID:11507069                                     |
| Bosutinib      |  | CDK2 inhibition       | PMID:22037378                                                       |

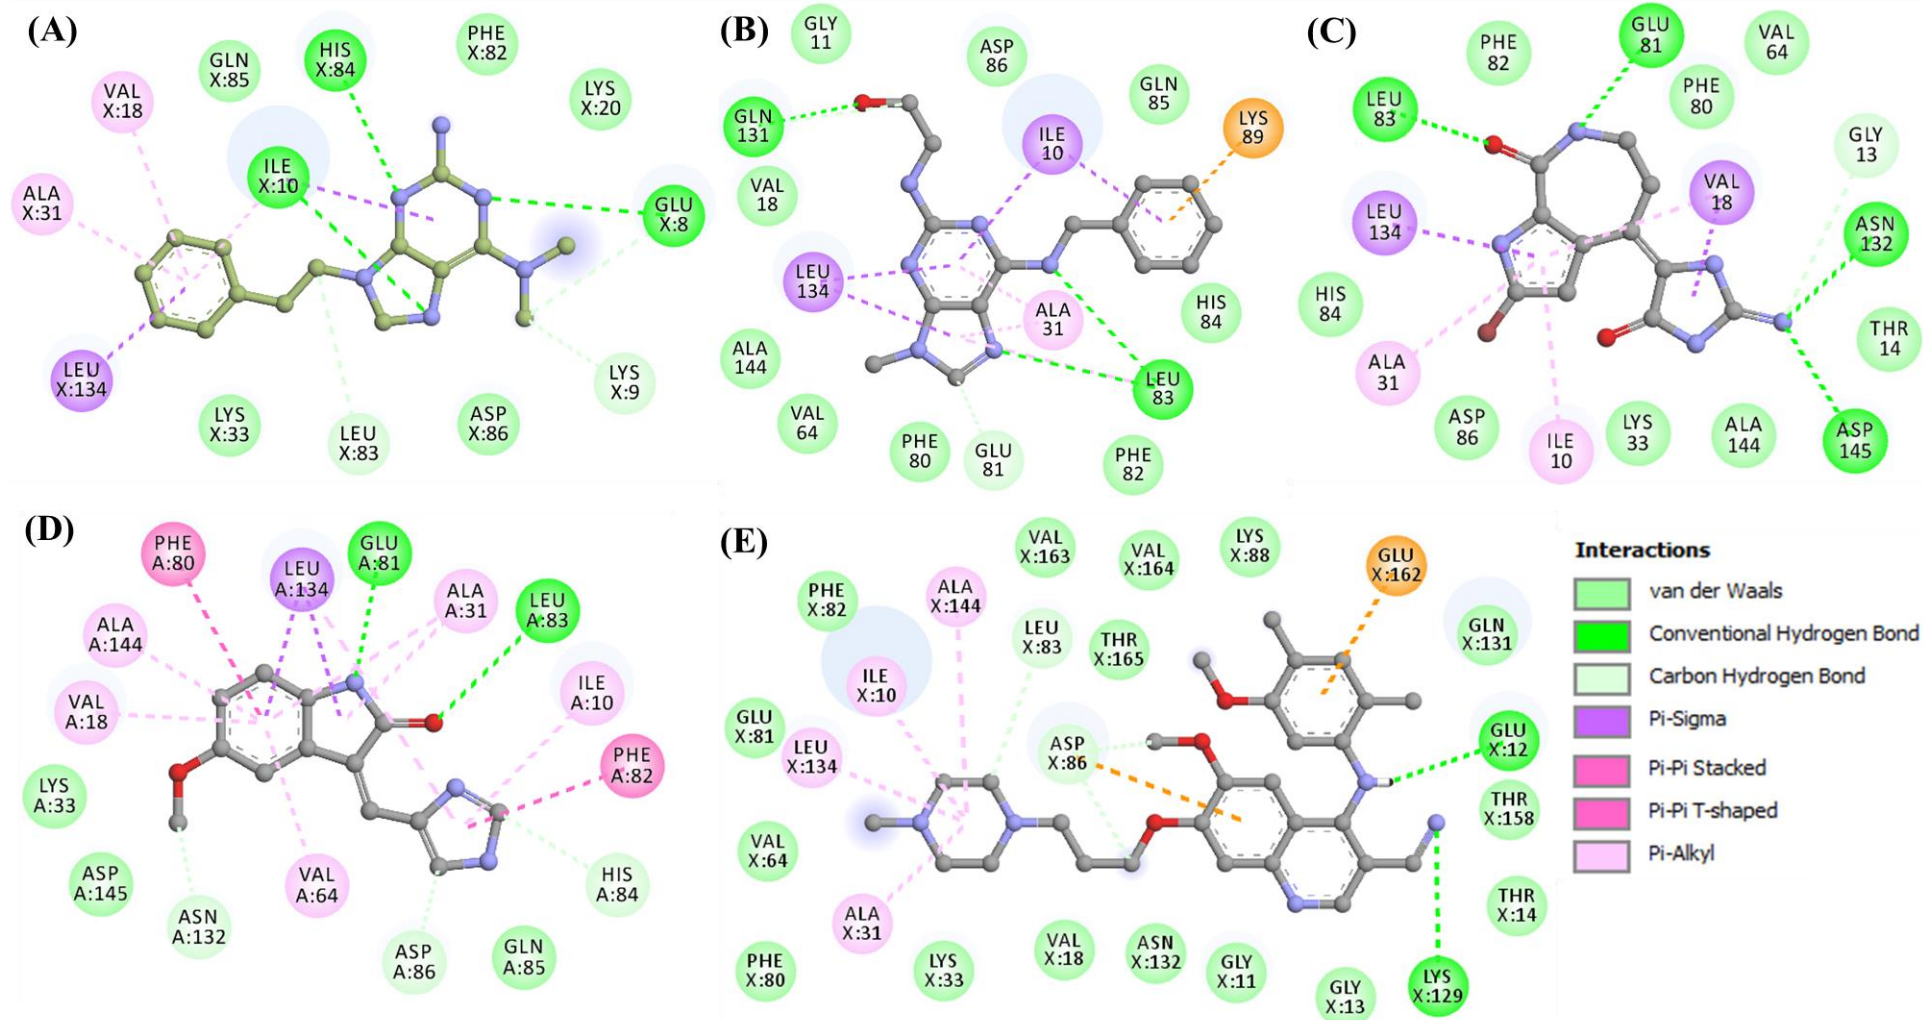

Figure S1: Interactions of CDK2 binding pocket with (A) docked compound 101874157, and reported co-crystallized inhibitors (B) Olomoucine, (C) Hymenialdisine, (D) SU9516 and (E) docked Bosutinib.

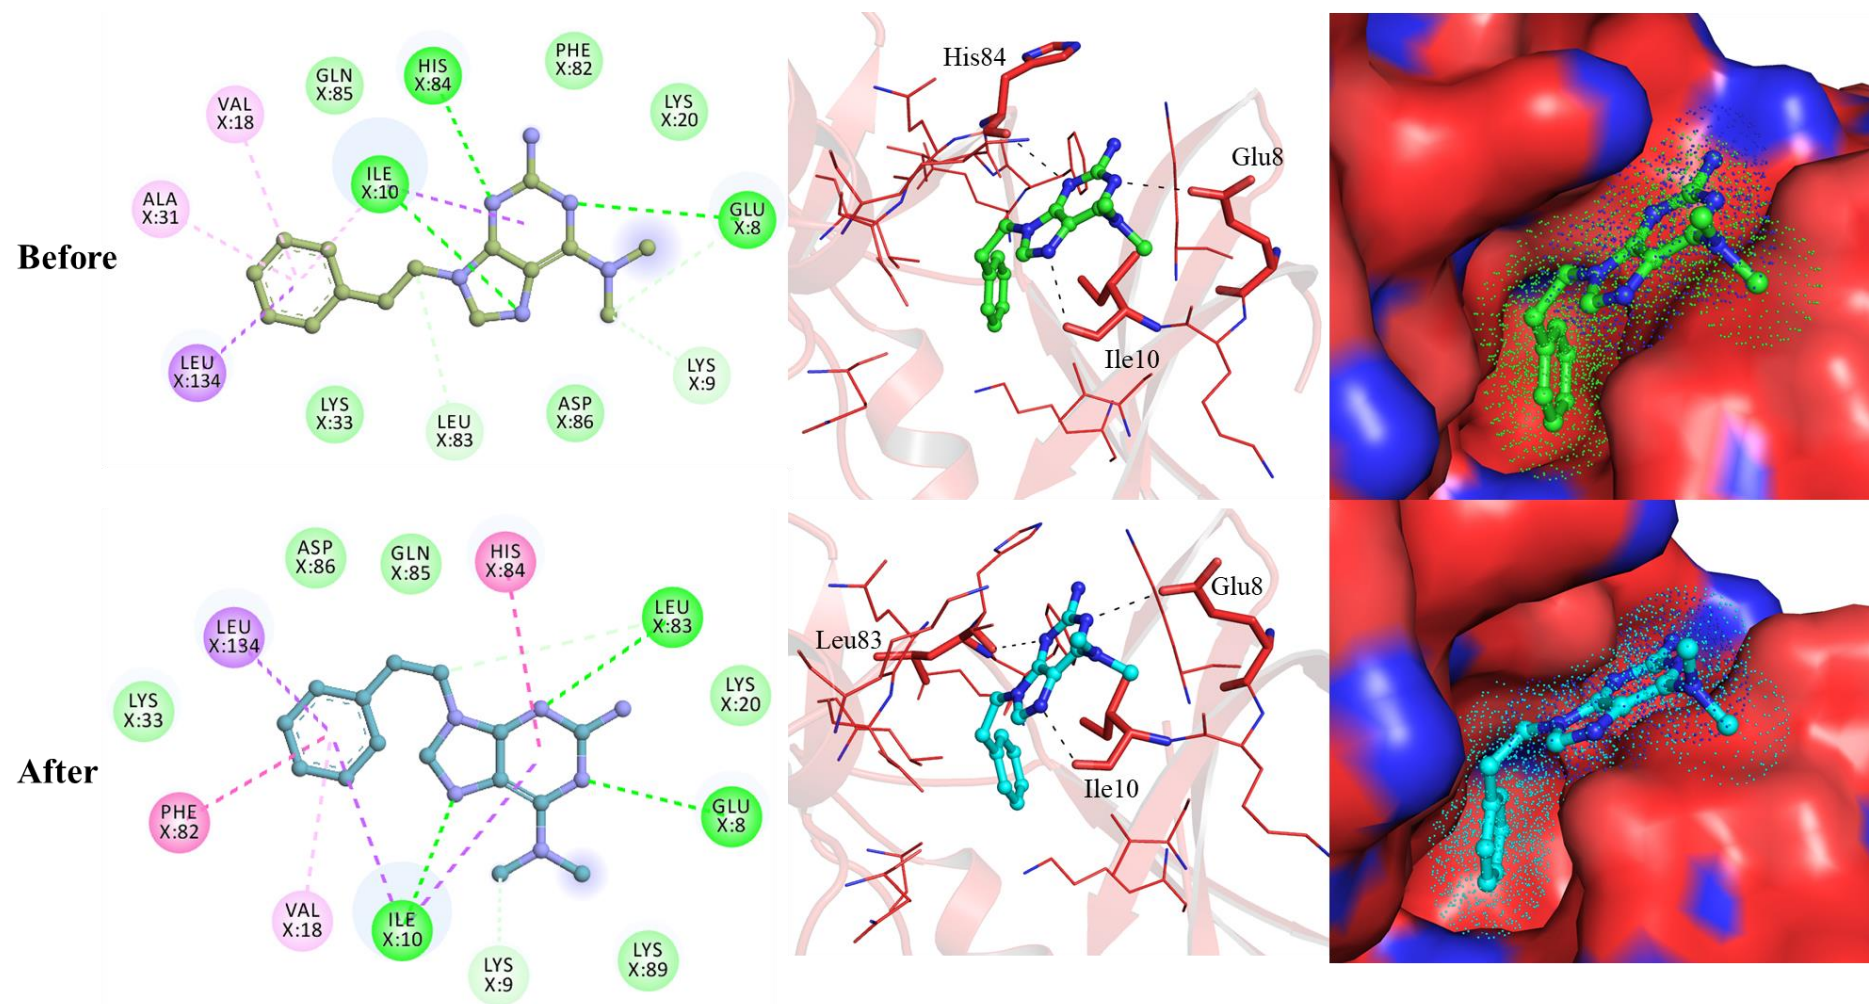

**Figure S2:** Interactions of compound 101874157 with CDK2 before and after dynamic simulation.
